# Supplementary material
Source: MDPI journal article supplement (https://www.mdpi.com/2304-6740/9/2/11)

# Supplementary Materials: Synthesis and Physical Properties of Tetrathiafulvalene-8-Quinolinato Zinc(II) and Nickel(II) Complexes

Keijiro Tsujimoto, Shinya Yamamoto and Hideki Fujiwara

5

(1) Emission spectra of the  $10^{-6}$  M  $\text{CHCl}_3$  solution of complexes **1**, **2**,  $\text{Znq}_2$  and  $\text{Niq}_2$ .

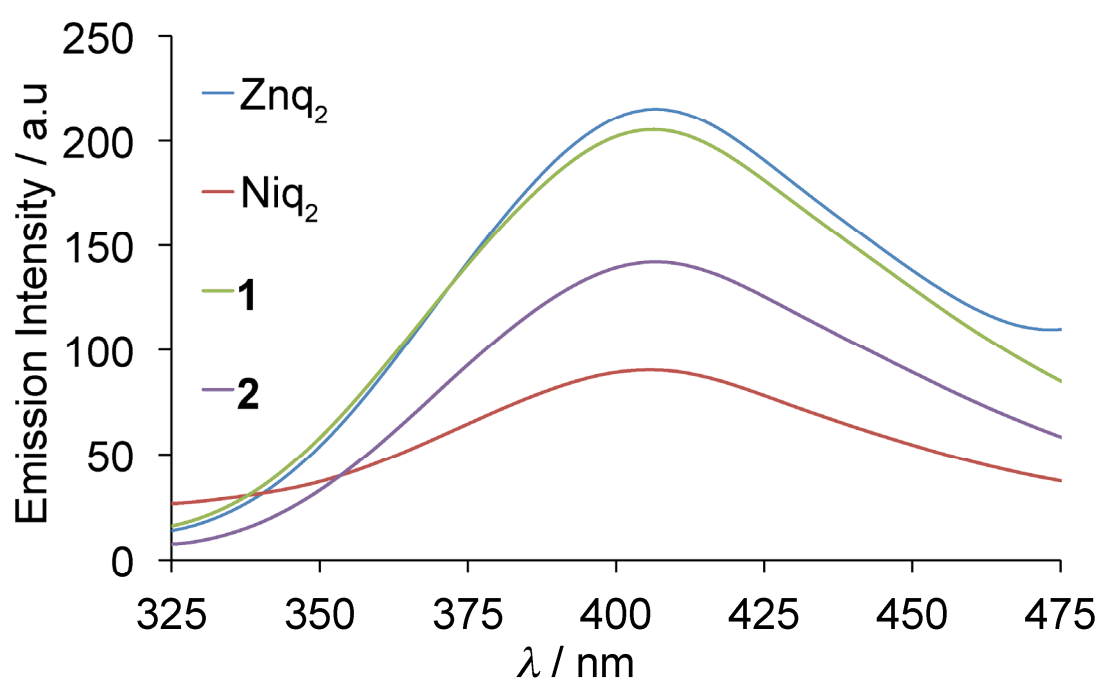

10

**Figure S1.** Emission spectra of the  $10^{-6}$  M  $\text{CHCl}_3$  solution of complexes **1** and **2**,  $\text{Znq}_2$  and  $\text{Niq}_2$  measured at room temperature under the identical conditions using an excitation light of 268 nm.

(2) Molecular orbital calculation of complexes **1** and **2** on the basis of the DFT and TD-DFT theory at the B3LYP level using the LANL2DZ basis set for the central zinc and nickel atoms and the 6-31G(d, p) basis set for the other atoms.

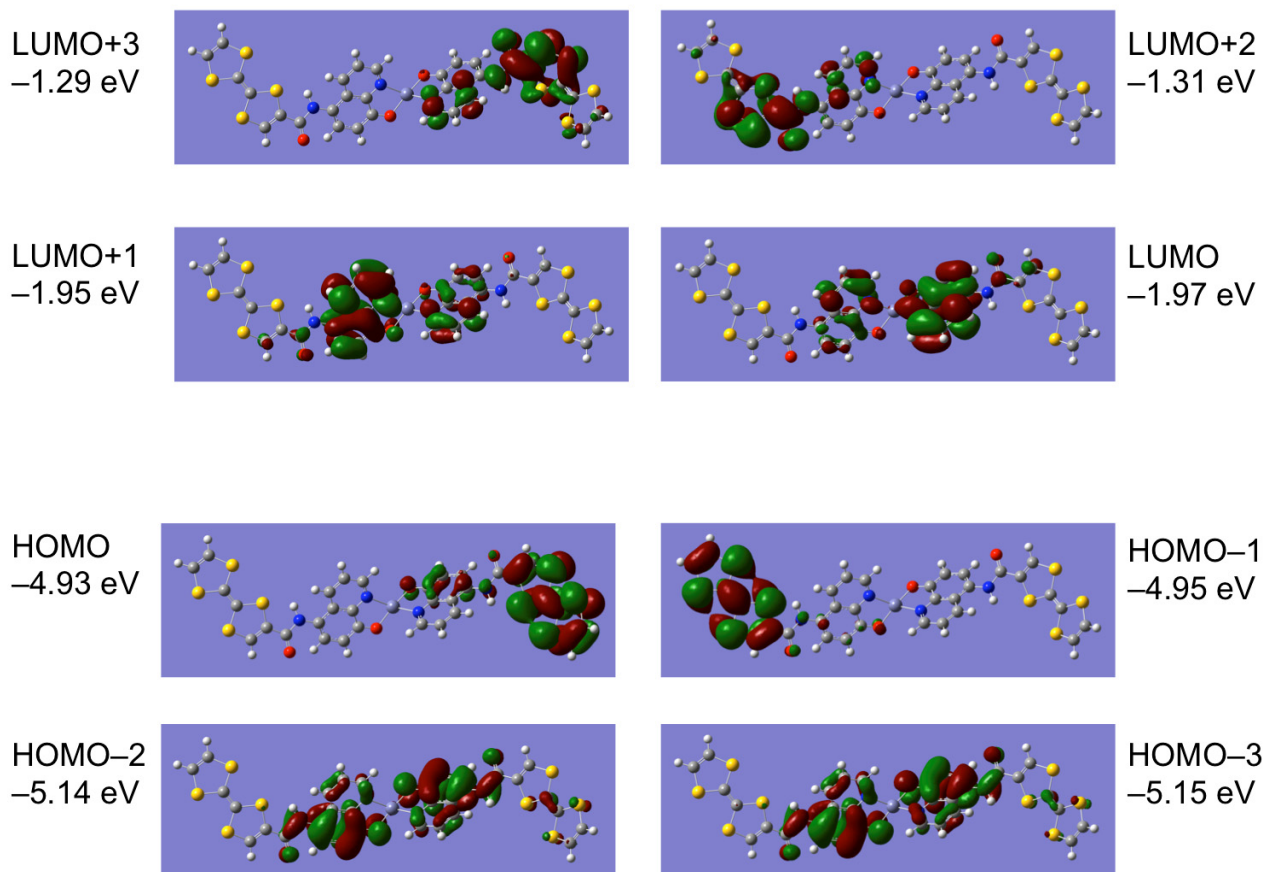

Figure S2. Molecular orbitals and energy levels of Zn complex **1**.

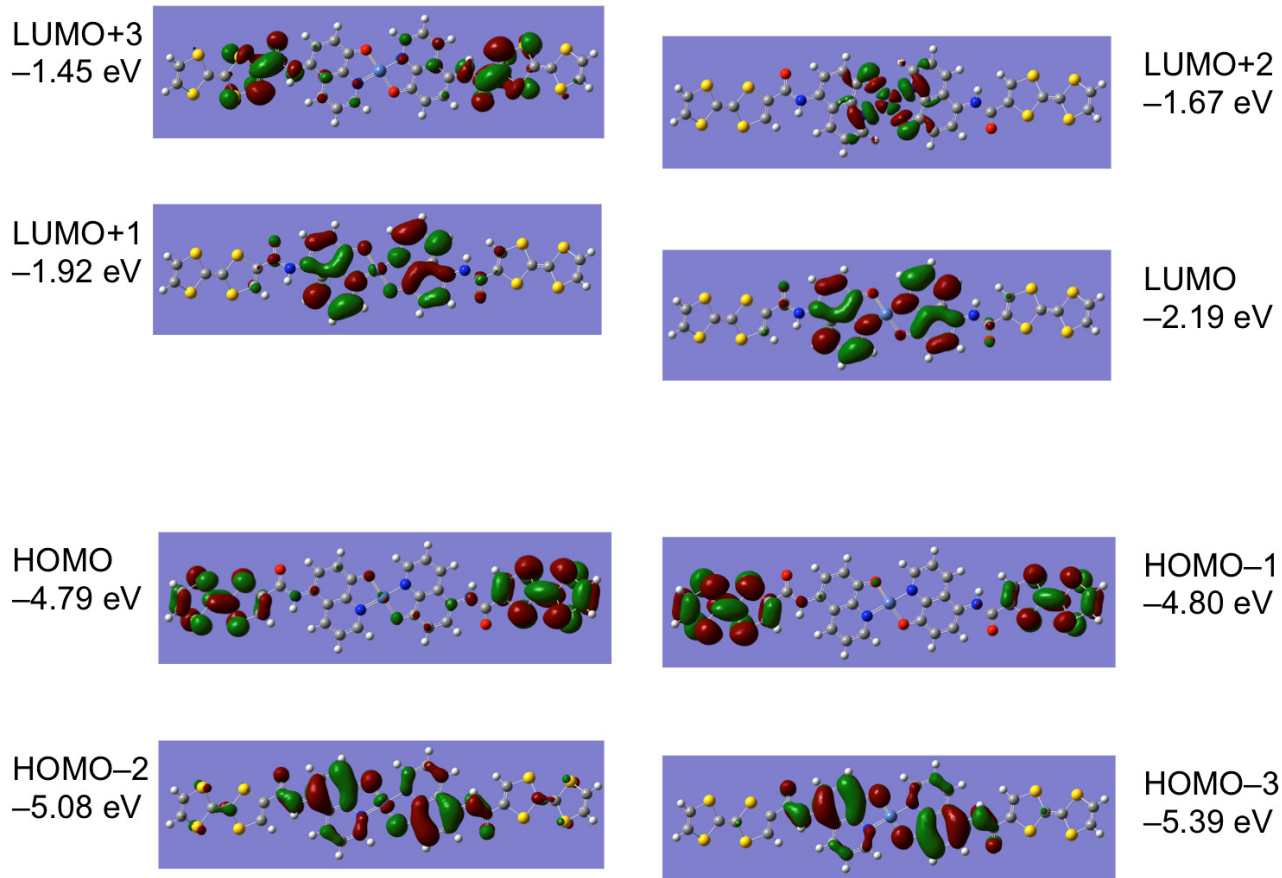

Figure S3. Molecular orbitals and energy levels of Ni complex 2.

(a) Zn complex 1.

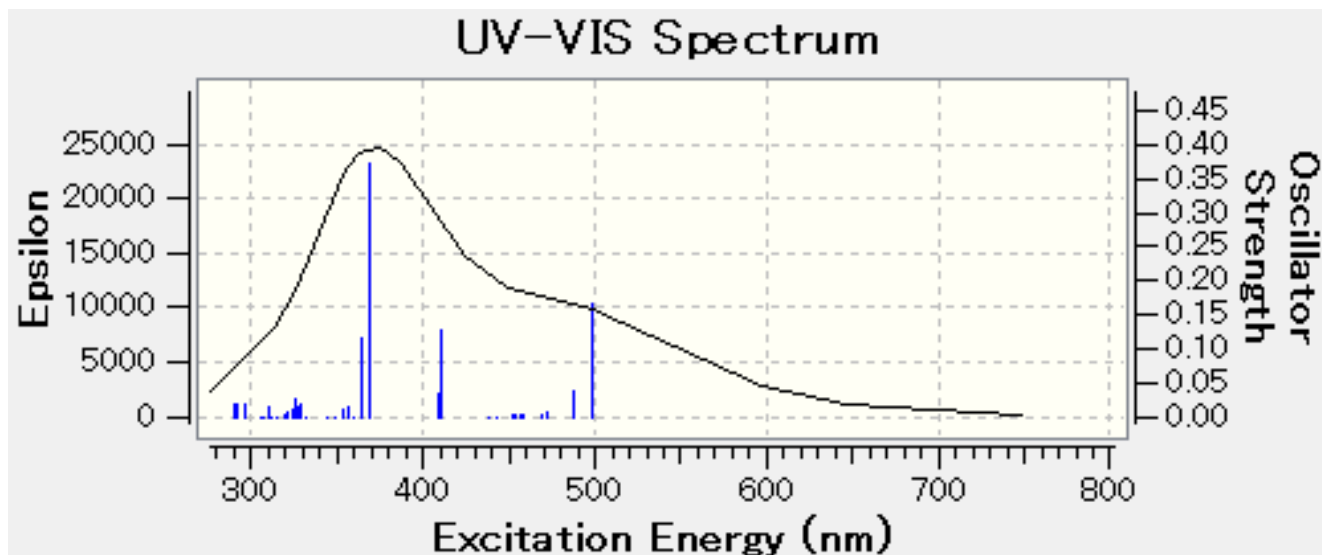

(b) Ni complex 2.

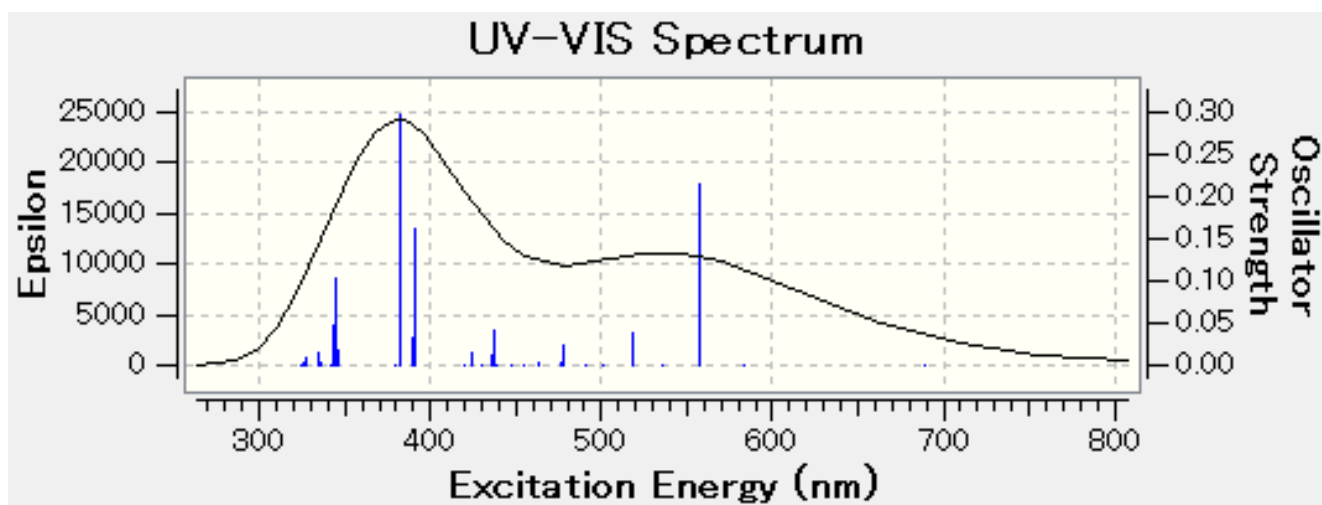**Figure S4.** UV-Vis simulated spectra of 1 and 2 calculated on the basis of a TD-DFT method.

(3) NMR charts of compounds 4, 5, 6 and Zn complex 1.  
 NMR chart of 4 (400 MHz, CDCl<sub>3</sub>)

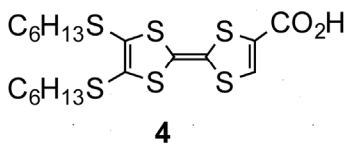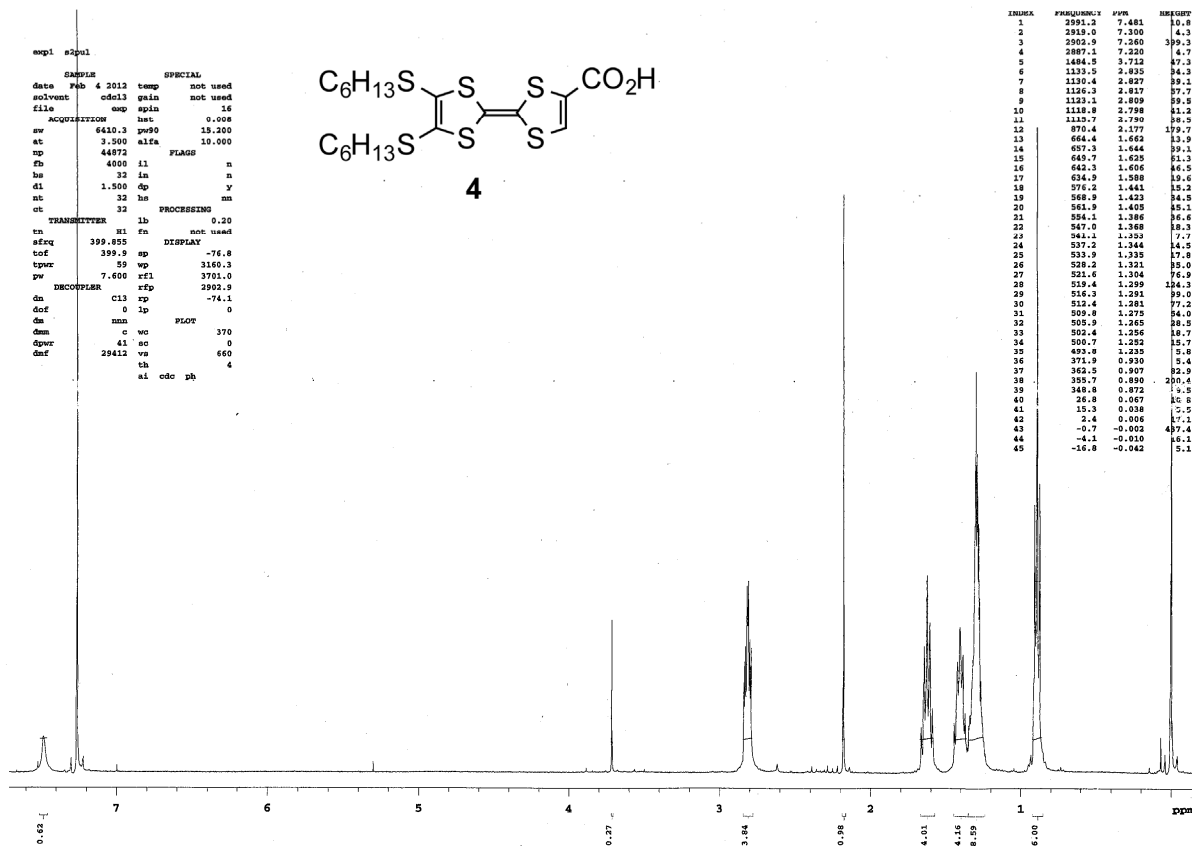

NMR chart of 5 (400 MHz, CDCl<sub>3</sub>)

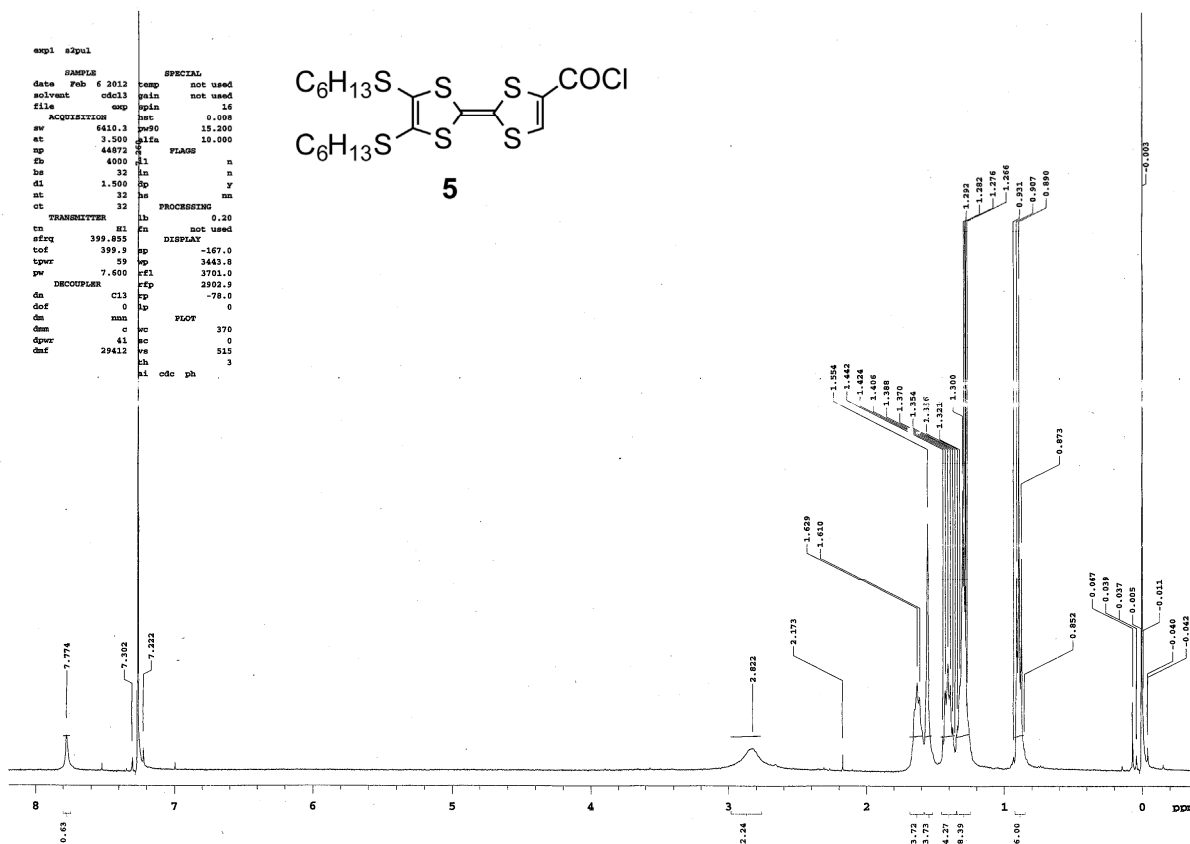

NMR chart of 6 (400 MHz, CDCl<sub>3</sub>)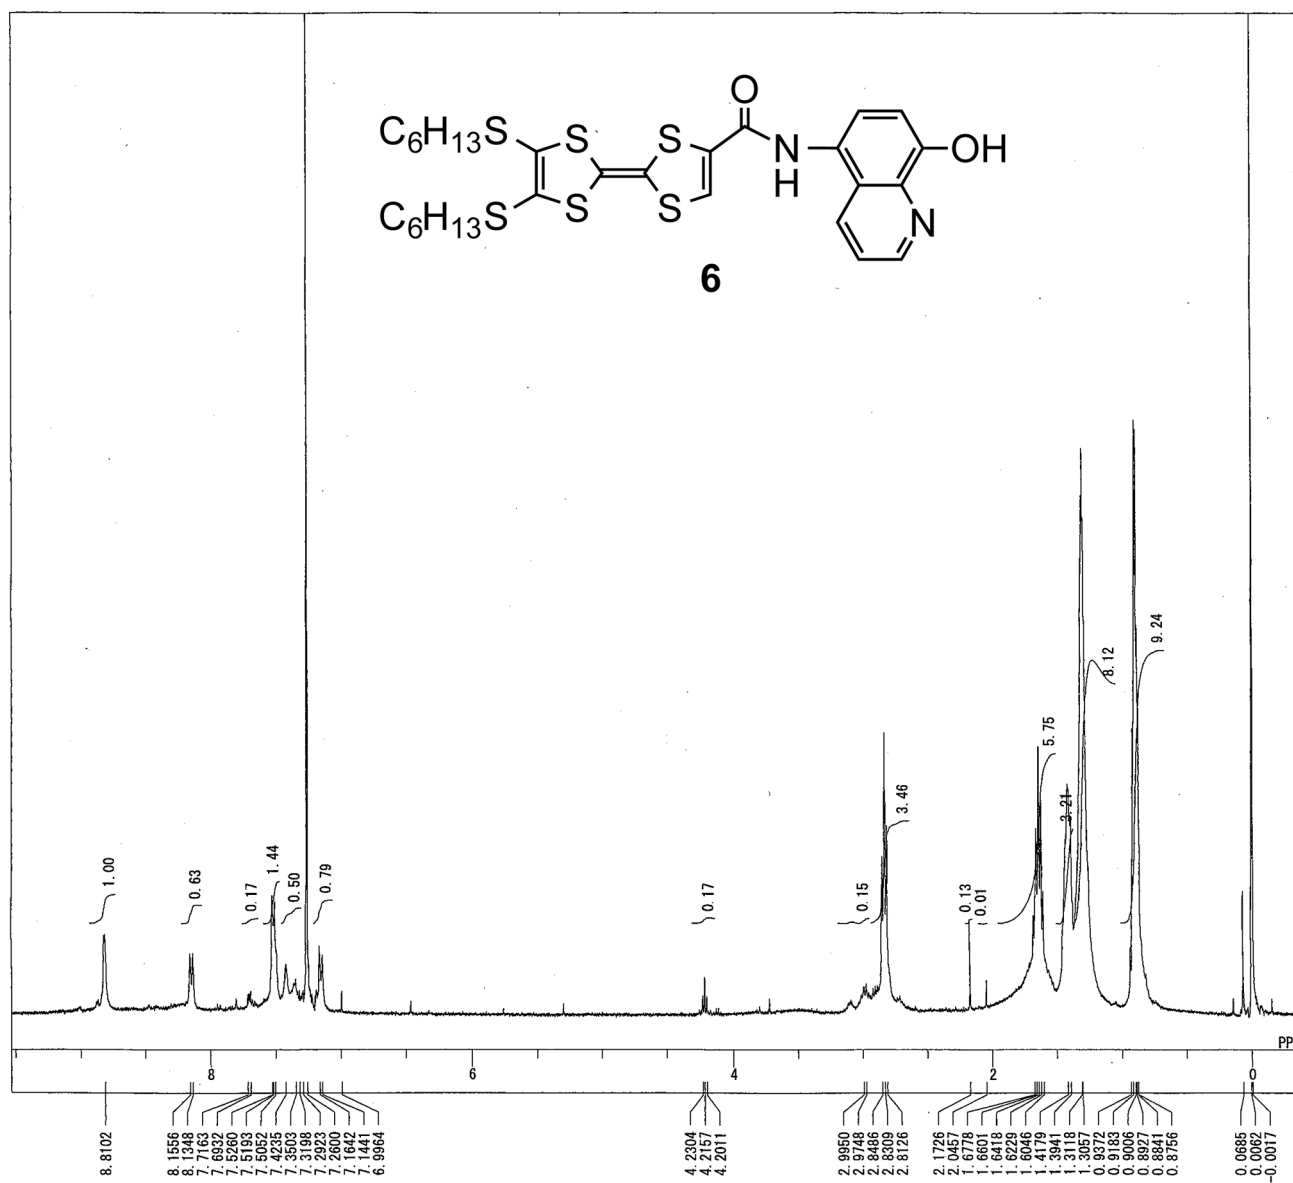

NMR chart of Zn complex 1 (400 MHz, DMSO-d<sub>6</sub>)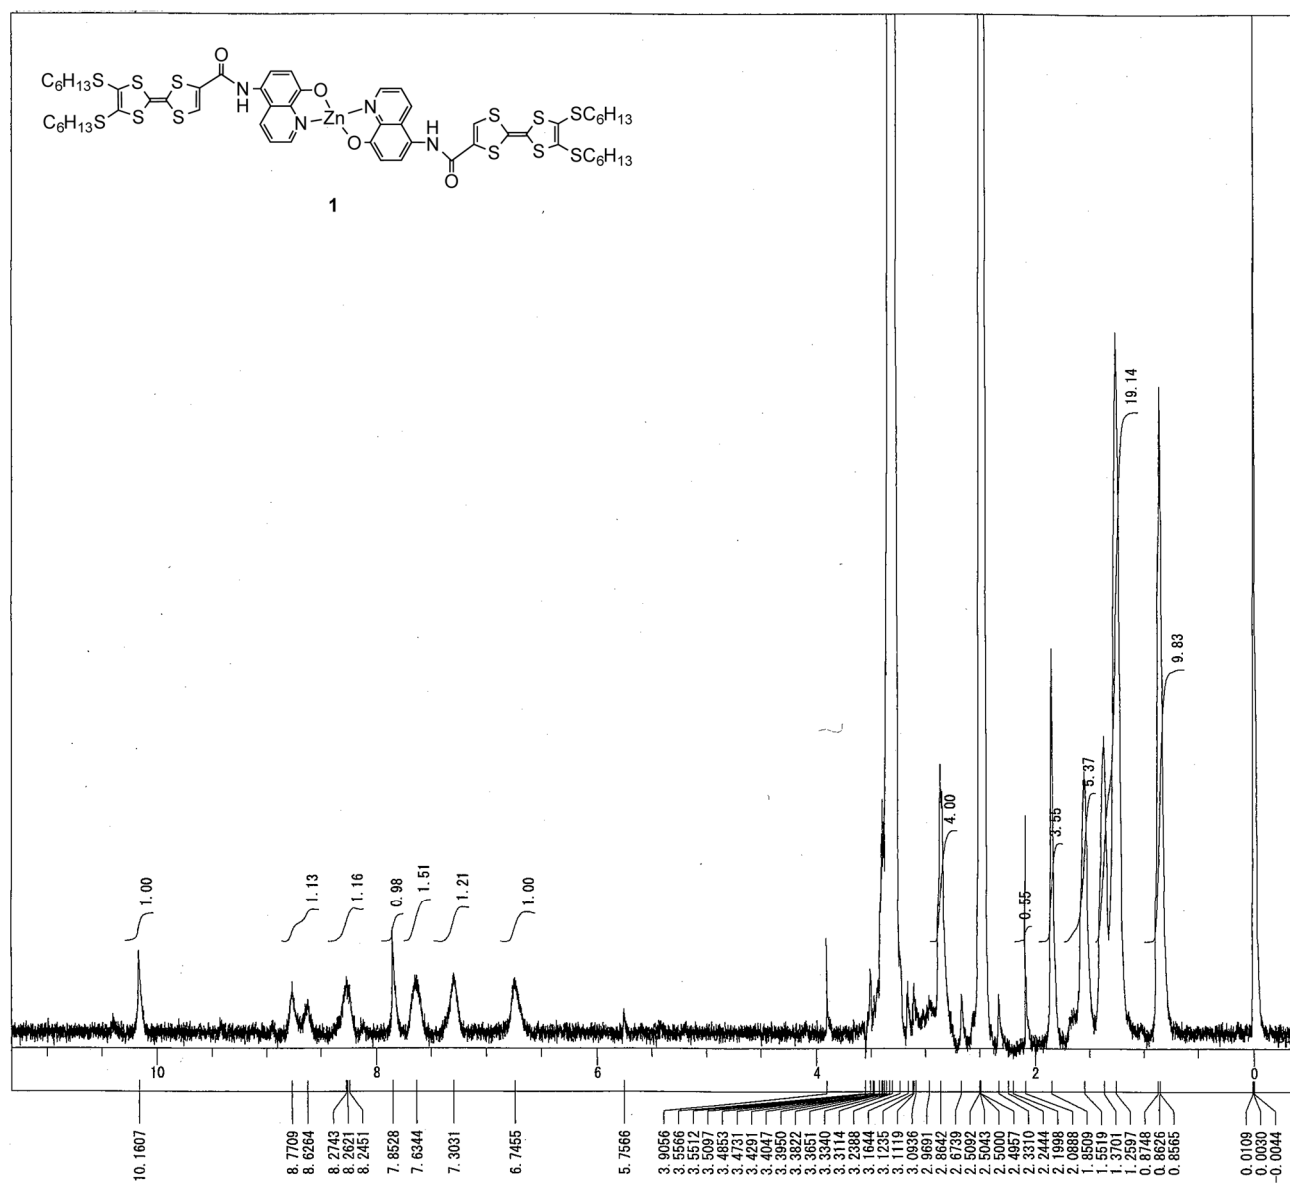

Supplement: s1 [file s1]
